# Supplementary material for: Resveratrol Improves the Energy Sensing and Glycolipid Metabolism of Blunt Snout Bream Megalobrama amblycephala Fed High-Carbohydrate Diets by Activating the AMPK–SIRT1–PGC-1α Network
Source: PubMed Central journal article supplement (PMC6141669; doi:10.3389/fphys.2018.01258), 2018-09-11
Supplement: Image_1.pdf [file Image_1.pdf]

## *Supplementary Material*

# **Resveratrol Improves the Energy Sensing and Glycolipid Metabolism of Blunt Snout Bream *Megalobrama amblycephala* Fed High-carbohydrate Diets by Activating the AMPK-SIRT1-PGC-1 $\alpha$ Network**

Hua-Juan Shi<sup>1</sup>, Chao Xu<sup>1</sup>, Ming-Yang Liu<sup>2, 3</sup>, Bing-Ke Wang<sup>1</sup>, Wen-Bin Liu<sup>1</sup>, Dan-Hong Chen<sup>1</sup>, Li Zhang<sup>1</sup>, Chen-Yuan Xu<sup>1</sup>, Xiang-Fei Li<sup>1\*</sup>

<sup>1</sup> Key Laboratory of Aquaculture Nutrition and Feed Science of Jiangsu Province, College of Animal Science and Technology, Nanjing Agricultural University, No.1 Weigang Road, Nanjing 210095, People's Republic of China.

<sup>2</sup> Wuxi Fisheries College, Nanjing Agricultural University, Wuxi 214081, China.

<sup>3</sup> Key Laboratory of Freshwater Fisheries and Germplasm Resources Utilization, Ministry of Agriculture, Freshwater Fisheries Research Center, Chinese Academy of Fishery Sciences, Wuxi 214081, China.

\*Corresponding Author: Key Laboratory of Aquatic Nutrition and Feed Science of Jiangsu Province, College of Animal Science and Technology, Nanjing Agricultural University, No. 1 Weigang Road, Nanjing 210095, Jiangsu Province, People's Republic of China. Tel (Fax): 86-025-84395382. E-mail: [xfli@njau.edu.cn](mailto:xfli@njau.edu.cn) (Xiang-Fei Li).

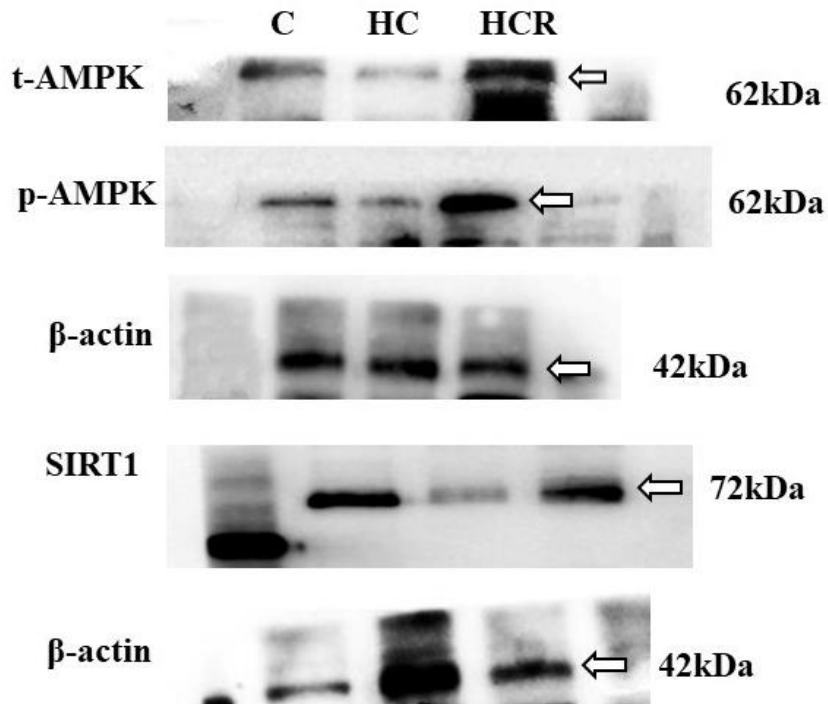

**Figure 1.** Hepatic t-AMPK $\alpha$  contents, p-AMPK $\alpha$  contents, SIRT1 contents and  $\beta$ -actin levels of blunt snout bream liver fed different experimental diets. Gels were loaded with 20  $\mu$ g total protein per lane. Control, diet with 30% carbohydrate level; HC, diet with 41% carbohydrate level; HCR, diet with 41% carbohydrate and 0.04% resveratrol. t-AMPK $\alpha$ , AMP-activated protein kinase  $\alpha$ ; phosphorylated AMP-activated protein kinase  $\alpha$ ; SIRT1, Sirtuin-1.
